# Supplementary material
Source: PubMed Central journal article supplement (PMC11028559)
Supplement: 262_2016_1908_MOESM1_ESM.pdf [file 262_2016_1908_MOESM1_ESM.pdf]

## Supplementary Table 1:

|                           | Sampling strategy |      |      |      |      |     |      |      |      |
|---------------------------|-------------------|------|------|------|------|-----|------|------|------|
|                           | a                 | b    | c    | d    | e    | f   | g    | h    | i    |
| <b>Mean</b>               | 339               | 466  | 290  | 1558 | 523  | 252 | 357  | 285  | 367  |
| <b>Median</b>             | 204               | 398  | 182  | 1644 | 359  | 224 | 262  | 130  | 272  |
| <b>Mean % diff from A</b> | na                | 37   | -14  | 350  | 54   | -25 | 5    | -15  | 9    |
| <b>STDEV</b>              | 382               | 363  | 334  | 918  | 577  | 191 | 422  | 426  | 343  |
| <b>MIN</b>                | 32                | 54   | 36   | 338  | 31   | 7   | 20   | 37   | 44   |
| <b>MAX</b>                | 1792              | 1672 | 1576 | 3366 | 2730 | 693 | 2116 | 2104 | 1553 |

The distribution of CD8 densities (per mm<sup>2</sup>) in the 23 samples as obtained by the different sampling methods (a-i), and the percent difference of the mean compared to the whole tumor assessment (a). STDEV: standard deviation. MIN: smallest density. MAX: largest density.

## Supplementary Table 2:

|           |                |    |                 |                 | Whole tumor |        | Central tumor |        |
|-----------|----------------|----|-----------------|-----------------|-------------|--------|---------------|--------|
|           |                | N  | Whole tumor     | Central tumor   | CD8 Low     | CD8 Hi | CD8 Low       | CD8 Hi |
| Histology | Adenocarcinoma | 12 | 329 (25 - 632)  | 295 (28 - 562)  | 6           | 6      | 6             | 6      |
|           | Squamous cell  | 11 | 350 (173 - 527) | 285 (134 - 435) | 5           | 6      | 5             | 6      |
| Stage     | 1              | 3  | 443 (0 - 1279)  | 419 (0 - 1180)  | 1           | 2      | 0             | 1      |
|           | 2              | 2  | 146 (0 - 883)   | 108(0 - 991)    | 1           | 1      | 2             | 0      |
|           | 3              | 18 | 343 (139 - 547) | 289 (112-465)   | 9           | 9      | 9             | 9      |
| Age       | >70            | 13 | 347 (67 - 628)  | 302 (53 - 551)  | 6           | 7      | 8             | 5      |
|           | ≤70            | 10 | 328 (140 - 515) | 275 (122 - 428) | 5           | 5      | 3             | 7      |

The distribution of CD8 densities (per mm<sup>2</sup>), and categories (Low and Hi across the median) in the 23 whole tumor and central tumor samples according to different clinical characteristics (tumor histology, clinical stage and patient age). Results are reported as mean densities per mm<sup>2</sup> and 95% confidence intervals are shown in parentheses.

# Supplementary Figure 1:

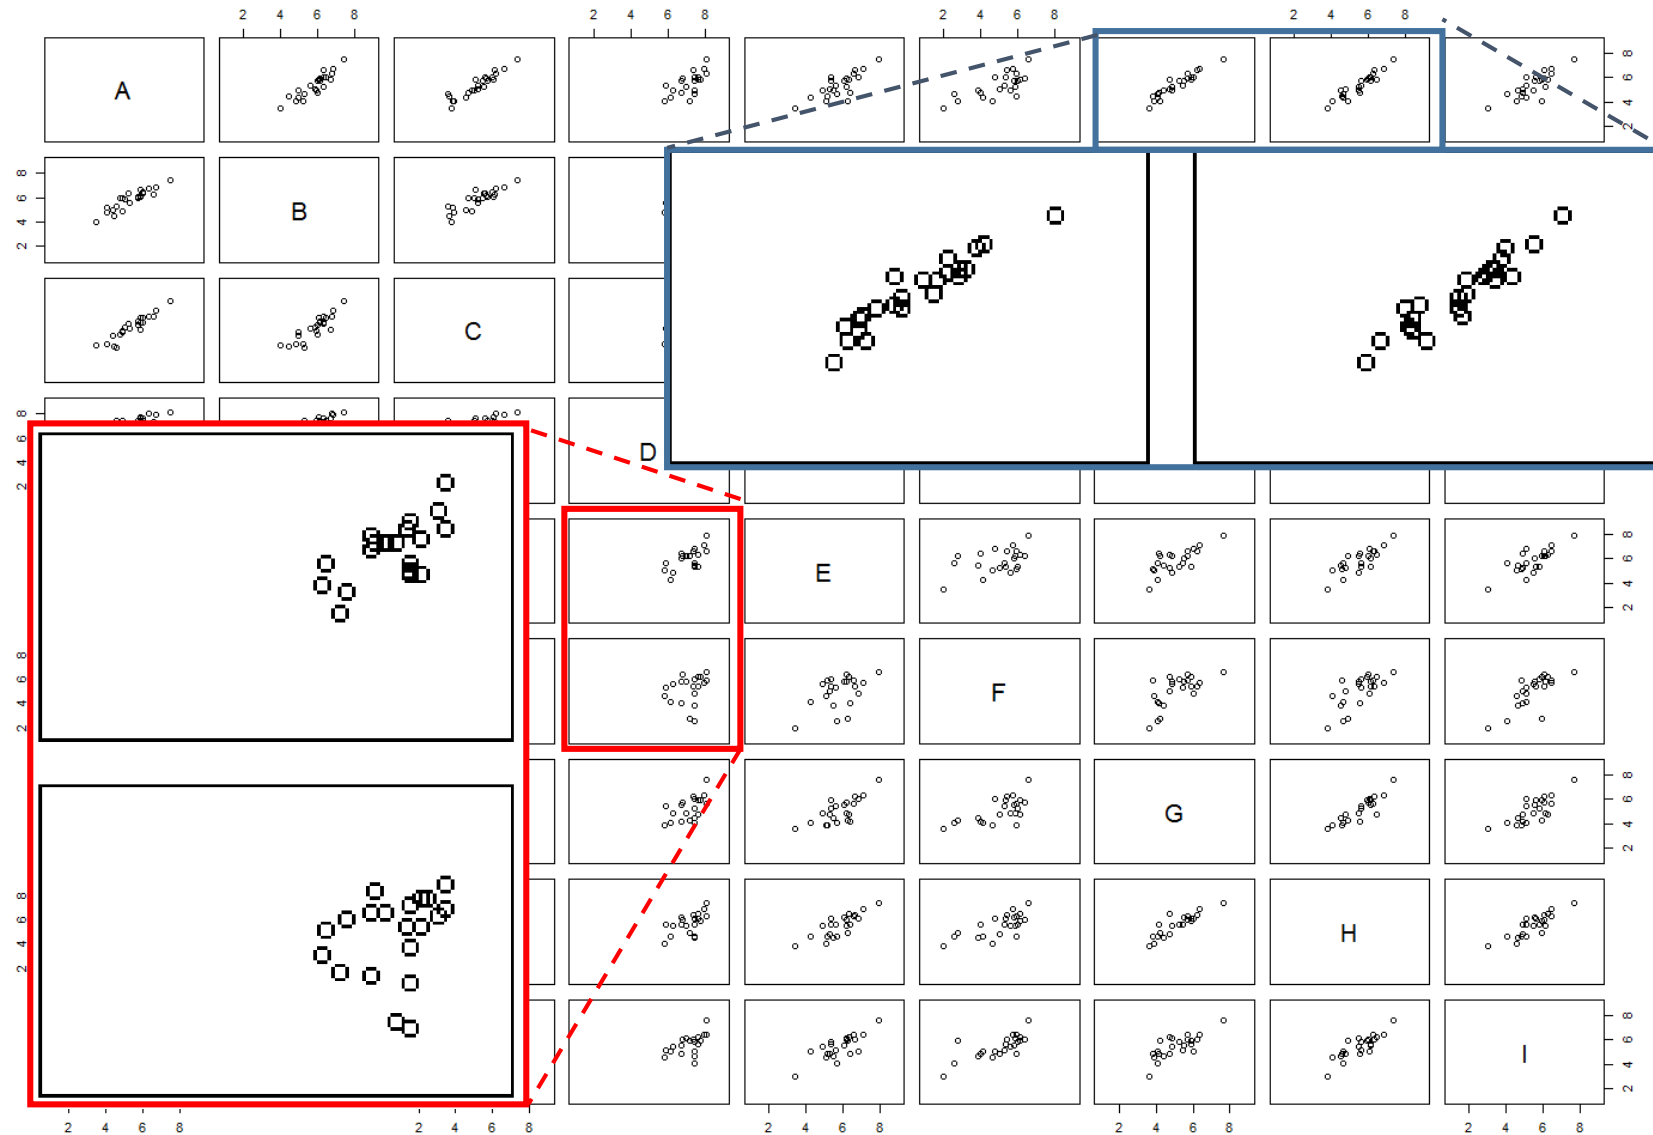

*Array of Scatter Plots:* Displaying inter-method associations of CD8 densities between each pair of the 9 sampling strategies used.

## Supplementary Figure 2:

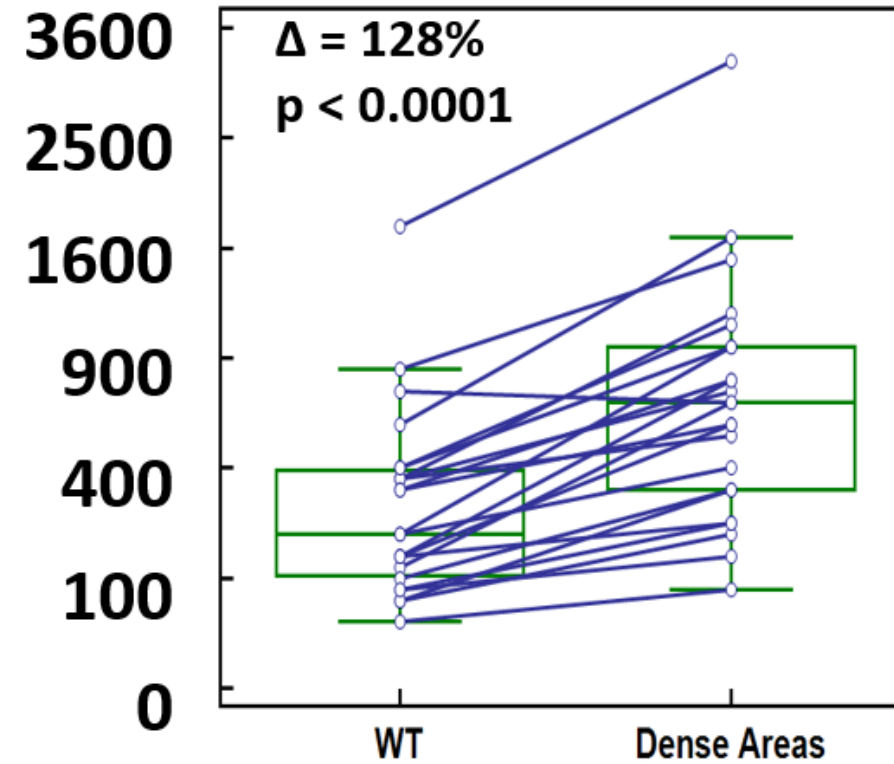

*Three Densest Areas Vs Whole Tumor:* Comparison of CD8 densities obtained from the whole to tumor to those obtained from the three densest areas that are included in the most representative areas assessment (noted B). The difference of the means is reported and the significance is tested using a paired T-test. WT: whole tumor.

## Supplementary Figure 3:

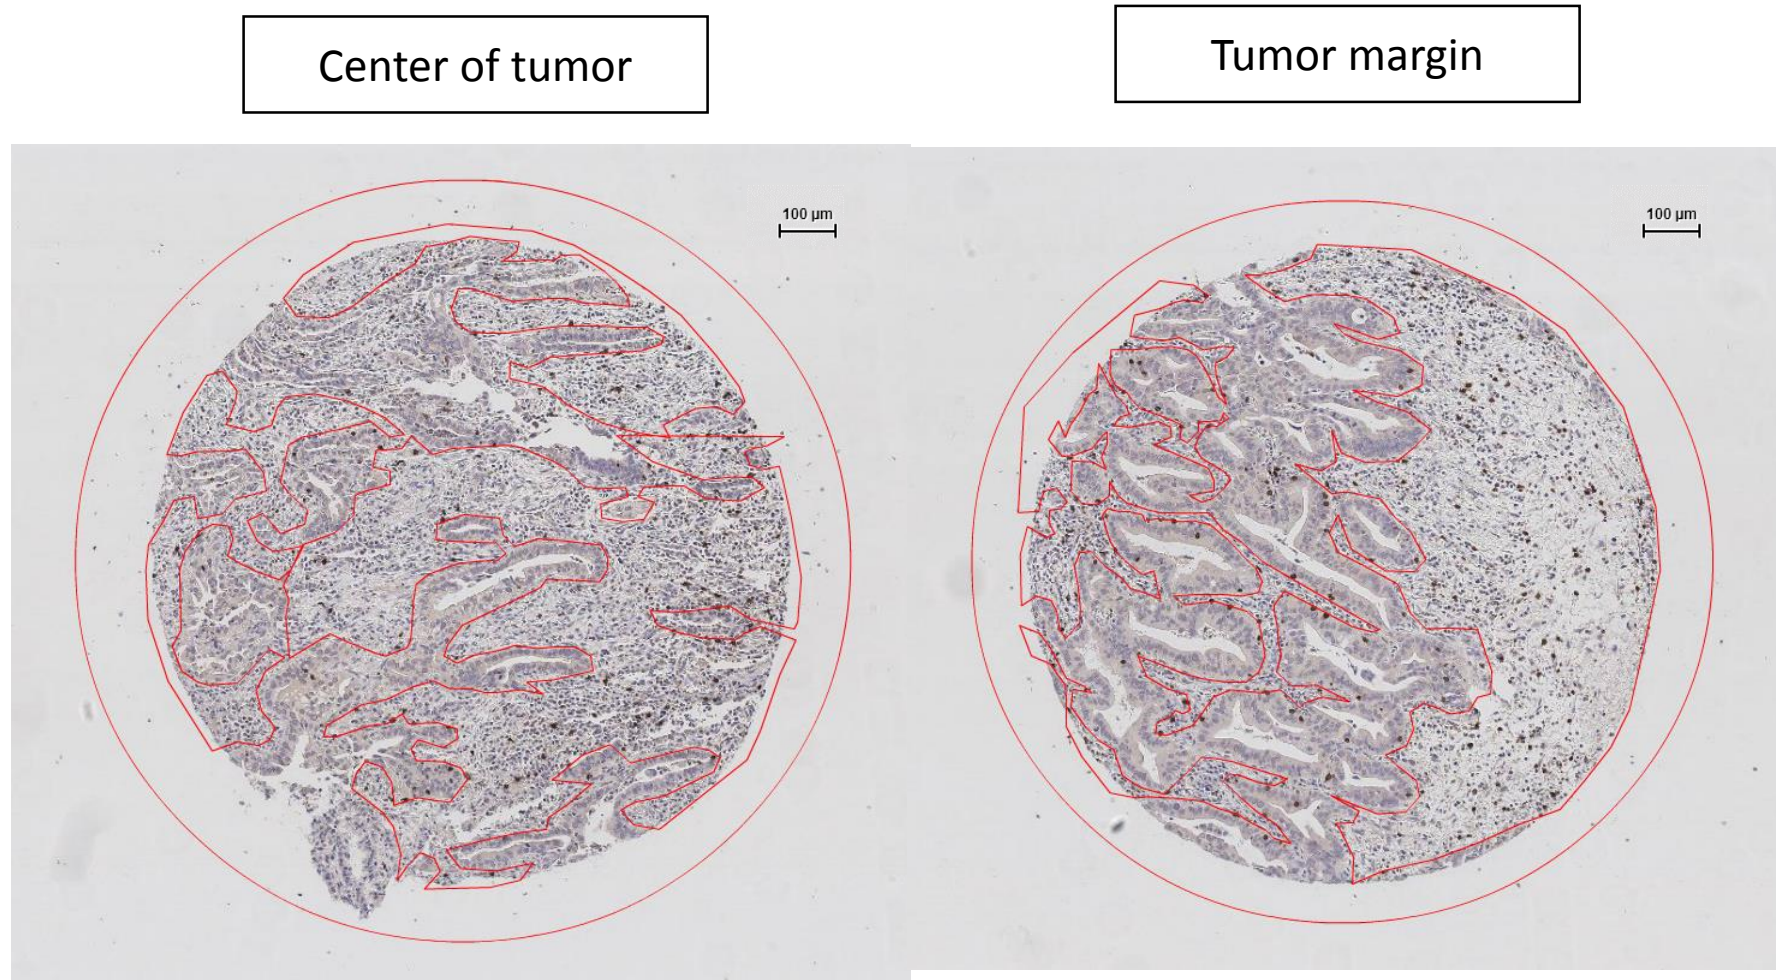

*Stromal and Intra-Epithelial Areas:* Example of demarcation of stromal areas vs cancer cell nests within two NSCLC tissue microarray cores.
